# Supplementary material for: Expression of Checkpoint Molecules in the Tumor Microenvironment of Intrahepatic Cholangiocarcinoma: Implications for Immune Checkpoint Blockade Therapy
Source: MDPI journal article supplement (doi:10.3390/cells12060851), 2023-03-09
Supplement: s1 [file s1]

Supplementary Information

Supplementary Table S1. Antibodies and

| Antibody     | Marker      | Dilution | Incubation time | Manufacturer |
|--------------|-------------|----------|-----------------|--------------|
| CD4          | T cell      | 1:500    | 30 min          | Dako         |
| CD8          | T cell      | 1:500    | 30min           | Dako         |
| CD68         | Macrophages | 1:6000   | 30 min          | Dako         |
| TIM-3        | Checkpoint  | 1:500    | Over night      | Abcam        |
| TIGIT        | Checkpoint  | 1:200    | Over night      | Abcam        |
| LAG-3/CD223  | Checkpoint  | 1:300    | Over night      | LSBIO        |
| ICOS/CD278   | Checkpoint  | 1:200    | Over night      | Abcam        |
| CTLA-4/CD152 | Checkpoint  | 1:300    | Over night      | Origene      |
| PD-1/CD279   | Checkpoint  | 1:250    | Over night      | Abcam        |
| PD-L1/CD274  | Checkpoint  | 1:200    | Over night      | Dako         |
| PD-L2/CD273  | Checkpoint  | 1:400    | Over night      | Abcam        |

Supplementary Table S2 ICCA p-values

|                     | Tumor - Sclerotic tumor | Tumor - Interface | Tumor - Normal | Interface - Normal | Interface - Sclerotic tumor | Normal - Sclerotic tumor |
|---------------------|-------------------------|-------------------|----------------|--------------------|-----------------------------|--------------------------|
| CD4                 | 0.9854                  | 0.1334            | <b>0.034</b>   | 0.5306             | 0.1081                      | <b>0.0246</b>            |
| CD4_CTLA            | 0.6117                  | 0.1559            | 0.115          | 0.7733             | <b>0.02</b>                 | <b>0.0125</b>            |
| CD4_ICOS            | 0.0975                  | 0.278             | 0.2021         | 0.8192             | 0.5014                      | 0.6635                   |
| CD4_ICOS_CTLA       | 0.6935                  | 0.4655            | 0.5132         | 0.9454             | 0.3888                      | 0.4069                   |
| CD4_ICOS_Tigit      | 0.4674                  | 0.9205            | 0.4242         | 0.634              | 0.4641                      | 0.2523                   |
| CD4_ICOS_Tigit_CTLA | 0.2956                  | 0.7986            | 0.6369         | 0.6137             | 0.4054                      | 0.2396                   |
| CD4_Lag3            | nan                     | 0.1482            | 0.7459         | 0.4517             | nan                         | nan                      |
| CD4_Lag3_Tim3       | nan                     | 0.3761            | 0.9672         | 0.6586             | nan                         | nan                      |
| CD4_PD1             | nan                     | 0.073             | 0.3317         | 0.5908             | nan                         | nan                      |
| CD4_PD1_Lag3        | nan                     | 0.1783            | 0.6057         | 0.6142             | nan                         | nan                      |
| CD4_PD1_Lag3_Tim3   | nan                     | 0.3514            | 0.9856         | 0.6218             | nan                         | nan                      |
| CD4_PD1_Tim3        | nan                     | <b>0.0278</b>     | 0.4509         | 0.4072             | nan                         | nan                      |
| CD4_Tigit           | 0.1067                  | 0.9408            | 0.6009         | 0.6855             | 0.2075                      | 0.0588                   |
| CD4_Tigit_CTLA      | 0.1471                  | 0.8192            | 0.5588         | 0.5842             | 0.2778                      | 0.0892                   |
| CD4_Tim3            | nan                     | <b>0.0137</b>     | 0.3329         | 0.4966             | nan                         | nan                      |
| CD68                | 0.1437                  | 0.1072            | 0.4734         | 0.818              | 0.7282                      | 0.7421                   |
| CD68_PD1            | 0.2098                  | 0.7637            | 0.8833         | 0.8797             | 0.1436                      | 0.2132                   |
| CD68_PD1_PDL1       | 0.4912                  | 0.7159            | 0.4846         | 0.6579             | 0.406                       | 0.3386                   |
| CD68_PD1_PDL1_PDL2  | 0.3972                  | 0.7537            | 0.5039         | 0.6588             | 0.3911                      | 0.3311                   |
| CD68_PD1_PDL2       | 0.4561                  | 0.7906            | 0.5152         | 0.6545             | 0.4621                      | 0.3557                   |
| CD68_PDL1           | 0.9133                  | 0.8463            | 0.8408         | 0.679              | 0.871                       | 0.7271                   |
| CD68_PDL1_PDL2      | 0.3917                  | 0.6654            | 0.922          | 0.6077             | 0.4693                      | 0.37                     |
| CD68_PDL2           | 0.2882                  | 0.8642            | 0.8881         | 0.7701             | 0.4446                      | 0.2828                   |
| CD8                 | <b>0.0002</b>           | <b>0.0</b>        | <b>0.0002</b>  | <b>0.0169</b>      | <b>0.0029</b>               | 0.5177                   |
| CD8_CTLA            | 0.5446                  | 0.2597            | 0.8321         | 0.5363             | 0.1134                      | 0.4819                   |
| CD8_ICOS            | 0.1359                  | 0.3099            | 0.4504         | 0.2544             | <b>0.0309</b>               | 0.8822                   |
| CD8_ICOS_CTLA       | 0.2274                  | 0.384             | 0.5009         | 0.4016             | 0.1442                      | 0.9009                   |
| CD8_ICOS_Tigit      | 0.4267                  | 0.2713            | 0.8943         | 0.4729             | 0.2079                      | 0.5621                   |
| CD8_ICOS_Tigit_CTLA | 0.2321                  | 0.6566            | 0.4891         | 0.4251             | 0.2031                      | 0.5882                   |
| CD8_Lag3            | nan                     | 0.5195            | 0.2751         | 0.8118             | nan                         | nan                      |
| CD8_Lag3_Tim3       | nan                     | 0.6208            | 0.9332         | 0.713              | nan                         | nan                      |
| CD8_PD1             | 0.4439                  | 0.6546            | 0.8904         | 0.8548             | 0.6859                      | 0.6274                   |
| CD8_PD1_Lag3        | nan                     | 0.0801            | 0.2062         | 0.6482             | nan                         | nan                      |
| CD8_PD1_Lag3_Tim3   | nan                     | 0.2781            | 0.6883         | 0.5197             | nan                         | nan                      |
| CD8_PD1_PDL1        | 0.2249                  | 0.1632            | 0.4447         | 0.2718             | <b>0.0288</b>               | 0.7746                   |
| CD8_PD1_PDL1_PDL2   | 0.4512                  | 0.0534            | 0.3639         | 0.2618             | 0.0675                      | 0.4678                   |
| CD8_PD1_PDL2        | 0.408                   | <b>0.0411</b>     | 0.3806         | 0.2443             | 0.0661                      | 0.548                    |
| CD8_PD1_Tim3        | nan                     | 0.2145            | 0.648          | 0.327              | nan                         | nan                      |
| CD8_PDL1            | 0.8644                  | 0.142             | 0.6785         | 0.4773             | <b>0.0112</b>               | 0.5338                   |
| CD8_PDL1_PDL2       | 0.5907                  | 0.2071            | 0.9464         | 0.3046             | 0.0792                      | 0.6236                   |
| CD8_PDL2            | 0.3476                  | 0.7645            | 0.8704         | 0.6818             | 0.6523                      | 0.3619                   |
| CD8_Tigit           | 0.7365                  | 0.4061            | 0.7947         | 0.7311             | 0.2109                      | 0.5941                   |
| CD8_Tigit_CTLA      | 0.5454                  | 0.4608            | 0.6682         | 0.3784             | 0.2021                      | 0.978                    |
| CD8_Tim3            | nan                     | 0.7116            | 0.9485         | 0.8235             | nan                         | nan                      |
